# Supplementary material for: Exploring and Developing the Questions Used to Measure the Human–Dog Bond: New and Existing Themes
Source: MDPI journal article supplement (doi:10.3390/ani12070805), 2022-03-22
Supplement: s1 [file s1]

## Supplementary Material

The 228 HAI questions identified by the two researchers (LS and HVW) as suitable to measure human-dog bond (HDB) in HAI tools published up to 01.01.2019 (identified via systematic literature reviews from Wilson & Netting (2012) and Samet et al. (in press)). Many tools shared related questions/content and many of the questions were used in multiple sources; those with similar or identical wording are included together with both references displayed. The recognised sources are cited (based on methodological information provided by authors in discussion of tool development). \* = The 18 questions categorised by researchers (LS + HVW) that were behaviourally measurable relating to dog investment in the HDB.

**Table S1.** The 228 HAI questions identified as suitable to measure HDB in HAI tools published up to 01.01.2019. \* Questions relating to dog investment in the HDB that were categorised as behaviourally measurable. Corresponding reference numbers can be found in paper.

| Questions/Statements                                                                                 | Example Sources                                                            |
|------------------------------------------------------------------------------------------------------|----------------------------------------------------------------------------|
| A reward would be offered for their return                                                           | Archer & Ireland (2011) Dog Attachment Questionnaire (DAQ) [49]            |
| After a hard day, I like to spend time with my dog                                                   | Schneider et al. (2010) Quality of Life and Human Animal Bond [30]         |
| At home, I sit with my dog close to me                                                               | Schneider et al. (2010) Quality of Life and Human Animal Bond [30]         |
| Being close to my pet is pleasant for me                                                             | Zilcha-Mano et al. (2011) Pet Attachment Questionnaire (PAQ) [67]          |
| Do you keep a picture of your pet in your wallet or on display at your home or office?               | Stallones et al. (1990) Quality of Attachment to Companion Animals [53]    |
| Expresses ownership of pet                                                                           | Melson (1998) Pet Attachment Scale – Revised (developed for children) [54] |
| Extra care is taken to ensure my dog does not escape or get lost                                     | Archer & Ireland (2011) Dog Attachment Questionnaire (DAQ) [49]            |
| Extra care is taken to ensure my dog is well taken care of whilst on holiday                         | Archer & Ireland (2011) Dog Attachment Questionnaire (DAQ) [49]            |
| Gets angry or annoyed about pet                                                                      | Melson (1998) Pet Attachment Scale – Revised (developed for children) [54] |
| Giving up my dog will be more difficult than any other dog I have raised in the past (if applicable) | Fratkin (2015) Relationship Questionnaire (RQ) [31]                        |
| Having a dog increased my self-esteem and self-worth                                                 | Archer & Ireland (2011) Dog Attachment Questionnaire (DAQ) [49]            |
| Having a dog is a source of contact and comfort                                                      | Archer & Ireland (2011) Dog Attachment Questionnaire (DAQ) [49]            |
| Having a dog means you cannot do what you want to                                                    | Archer & Ireland (2011) Dog Attachment Questionnaire (DAQ) [49]            |
| Having a pet gives me something to care for                                                          | Zasloff (1996) Comfort from Companion Animals Scale (CCAS) [64]            |
| Having a pet gives me something to love                                                              | Zasloff (1996) Comfort from Companion Animals Scale (CCAS) [64]            |
| Having pets is a waste of money                                                                      | Templer et al. (1981) Pet Attitude Scale (PAS) [55]                        |
| Having to deal with the death of my dog would be very hard                                           | Archer & Ireland (2011) Dog Attachment Questionnaire (DAQ) [49]            |

|                                                                                               |                                                                                                      |
|-----------------------------------------------------------------------------------------------|------------------------------------------------------------------------------------------------------|
| He/she is encouraged to sleep on my bed at night                                              | Archer & Ireland (2011) Dog Attachment Questionnaire (DAQ) [49]                                      |
| House pet/s / my pet adds happiness to my life                                                | Templer et al. (1981) Pet Attitude Scale (PAS) [55] / Geller (2005) Pet Attachment Scale (PATS) [65] |
| How hard is it to look after your dog                                                         | Dwyer et al. (2006) Monash Dog Owner Relationship Scale (MDORS) [62]                                 |
| How often did you clean up after your companion animal?                                       | Poresky et al. (1987) Companion Animal Bond Scale (CABS) [56]                                        |
| How often did you hold, stroke or pet your companion animal?                                  | Poresky et al. (1987) Companion Animal Bond Scale (CABS) [56]                                        |
| How often did your companion animal sleep in your room?                                       | Poresky et al. (1987) Companion Animal Bond Scale (CABS) [56]                                        |
| How often do you tell your dog things you don't tell anyone else                              | Dwyer et al. (2006) Monash Dog Owner Relationship Scale (MDORS) [62]                                 |
| How often does your dog stop you doing things you want to?                                    | Dwyer et al. (2006) Monash Dog Owner Relationship Scale (MDORS) [62]                                 |
| How often were you responsible for your companion animal's care?                              | Poresky et al. (1987) Companion Animal Bond Scale (CABS) [56]                                        |
| I always let my dog sleep in the crate in my bedroom instead of some other place in the house | Fratkin (2015) Relationship Questionnaire (RQ) [31]                                                  |
| I am affected by the way others react to my pet                                               | Cromer & Barlow (2013) Pet Attachment and Life Impact Scale (PALIS) [63]                             |
| I am emotionally dependent on my pet                                                          | Geller (2005) Pet Attachment Scale (PATS) [65]                                                       |
| I'm not very attached to my pet                                                               | Zilcha-Mano et al. (2011) Pet Attachment Questionnaire (PAQ) [67]                                    |
| I am proud of my pet                                                                          | Angle et al. (1993) Pet Bonding Scale (PBS) [57]                                                     |
| I am the one most likely to notice when my dog is not feeling well                            | Fratkin (2015) Relationship Questionnaire (RQ) [31]                                                  |
| I am the person that checks to make sure my dog has water on a daily basis                    | Fratkin (2015) Relationship Questionnaire (RQ) [31]                                                  |
| I am the person that feeds my dog on a daily basis                                            | Fratkin (2015) Relationship Questionnaire (RQ) [31]                                                  |
| I believe my pet is my best friend                                                            | Holcomb et al. (1985) Pet Attachment Survey (PAS) [58]                                               |
| I believe that pets should have the same rights and privileges as family members              | Holcomb et al. (1985) Pet Attachment Survey (PAS) [58]                                               |
| I can be myself with you                                                                      | Davis & Juhasz (1995) Pet Friendship Scale (PFS) [59]                                                |
| I confide in my pet                                                                           | Geller (2005) Pet Attachment Scale (PATS) [65]                                                       |
| I consider my pet to be a friend                                                              | Holcomb et al. (1985) Pet Attachment Survey (PAS) [58]                                               |
| I consider my pet to be a great companion                                                     | Holcomb et al. (1985) Pet Attachment Survey (PAS) [58]                                               |
| I count on my pet being there when I need comfort                                             | Geller (2005) Pet Attachment Scale (PATS) [65]                                                       |
| I do not feel like I have an emotional connection with my dog                                 | Fratkin (2015) Relationship Questionnaire (RQ) [31]                                                  |

|                                                                                                       |                                                                                                                    |
|-------------------------------------------------------------------------------------------------------|--------------------------------------------------------------------------------------------------------------------|
| I do not often call or email the puppy sitter to ask about my dog when I am away                      | Fratkin (2015) Relationship Questionnaire (RQ) [31]                                                                |
| I do not often talk about my dog to other people                                                      | Fratkin (2015) Relationship Questionnaire (RQ) [31]                                                                |
| I do not pet my dog frequently                                                                        | Fratkin (2015) Relationship Questionnaire (RQ) [31]                                                                |
| I do not understand my dog very well                                                                  | Fratkin (2015) Relationship Questionnaire (RQ) [31]                                                                |
| I don't feel comfortable opening up to pets                                                           | Beck & Madresh (2008) Pet and Partnership Scale (PPS) [60]                                                         |
| I enjoy playing with my dog                                                                           | Fratkin (2015) Relationship Questionnaire (RQ) [31]                                                                |
| I enjoy showing other people pictures of my pet                                                       | Holcomb et al. (1985) Pet Attachment Survey (PAS) [58]                                                             |
| I enjoy watching my pet                                                                               | Zasloff (1996) Comfort from Companion Animals Scale (CCAS) [64]                                                    |
| I feel as if my dog is currently progressing well for his/her age                                     | Fratkin (2015) Relationship Questionnaire (RQ) [31]                                                                |
| I feel distant from my pet                                                                            | Zilcha-Mano et al. (2011) Pet Attachment Questionnaire (PAQ) [67]                                                  |
| I feel emotionally attached to my dog                                                                 | Geller (2005) Pet Attachment Scale (PATS) [65] / Fratkin (2015) Relationship Questionnaire (RQ) [31]               |
| I feel more relaxed in company when my dog is present                                                 | Archer & Ireland (2011) Dog Attachment Questionnaire (DAQ) [49]                                                    |
| I feel sad when I am separated from my pet                                                            | Geller (2005) Pet Attachment Scale (PATS) [65]                                                                     |
| I feel satisfied with my relationship with my dog                                                     | Fratkin (2015) Relationship Questionnaire (RQ) [31]                                                                |
| I feel that my pet is a part of my family                                                             | Holcomb et al. (1985) Pet Attachment Survey (PAS) [58]                                                             |
| I find it easier to talk to my dog than to talk to people                                             | Fratkin (2015) Relationship Questionnaire (RQ) [31]                                                                |
| I focus on my dog more when he/she is doing something wrong than when he/she is doing something right | Fratkin (2015) Relationship Questionnaire (RQ) [31]                                                                |
| I frequently talk to my pet                                                                           | Templer et al. (1981) Pet Attitude Scale (PAS) [55] / Chumley et al. (1993) Military Companion Survey (MCS) [47]   |
| I get comfort from touching my pet                                                                    | Zasloff (1996) Comfort from Companion Animals Scale (CCAS) [64]                                                    |
| I get frustrated when my pet is not around as much as I would like it to be                           | Zilcha-Mano et al. (2011) Pet Attachment Questionnaire (PAQ) [67]                                                  |
| I give gifts to my pet for birthdays and special occasions                                            | Chumley et al. (1993) Military Companion Survey (MCS) [47] / Kafer et al. (2002) Pet Relationship Scale (PRS) [48] |
| I go to you when I am lonely                                                                          | Davis & Juhasz (1995) Pet Friendship Scale (PFS) [59]                                                              |
| I go to you when I am bored                                                                           | Davis & Juhasz (1995) Pet Friendship Scale (PFS) [59]                                                              |
| I hate going home when my dog is not there to greet me                                                | Archer & Ireland (2011) Dog Attachment Questionnaire (DAQ) [49]                                                    |
| I have a backup plan for managing my pet/s during a disaster if my first choice doesn't work          | Trigg et al. (2017) Pet Owner Risk Propensity Scale (PORPS) [61]                                                   |

|                                                                                    |                                                                                                                       |
|------------------------------------------------------------------------------------|-----------------------------------------------------------------------------------------------------------------------|
| I have attended most of the training classes for my dog                            | Fratkin (2015) Relationship Questionnaire (RQ) [31]                                                                   |
| I have lots of fun with my pet                                                     | Angle et al. (1993) Pet Bonding Scale (PBS) [57]                                                                      |
| I have no problem parting with my pet for a long duration                          | Zilcha-Mano et al. (2011) Pet Attachment Questionnaire (PAQ) [67]                                                     |
| I have regrets about getting my dog                                                | Schneider et al. (2010) Quality of Life and Human Animal Bond [30]                                                    |
| I interact or have close contact with my dog for a majority of the time I am awake | Fratkin (2015) Relationship Questionnaire (RQ) [31]                                                                   |
| I like my pet mostly because it is cute                                            | Cromer & Barlow (2013) Pet Attachment and Life Impact Scale (PALIS) [63]                                              |
| I like spending time with you                                                      | Davis & Juhasz (1995) Pet Friendship Scale (PFS) [59]                                                                 |
| I like to cuddle with my pet                                                       | Cromer & Barlow (2013) Pet Attachment and Life Impact Scale (PALIS) [63]                                              |
| I like to feed animals out of my hand                                              | Templer et al. (1981) Pet Attitude Scale (PAS) [55]                                                                   |
| I like to spend a lot of time with my pet                                          | Angle et al. (1993) Pet Bonding Scale (PBS) [57]                                                                      |
| I like to talk to my pet / about things that are important to me                   | Angle et al. (1993) Pet Bonding Scale (PBS) [57]                                                                      |
| I like you the way you are                                                         | Davis & Juhasz (1995) Pet Friendship Scale (PFS) [59]                                                                 |
| I look at my dog often                                                             | Fratkin (2015) Relationship Questionnaire (RQ) [31]                                                                   |
| I love my pet                                                                      | Geller (2005) Pet Attachment Scale (PATS) [65]                                                                        |
| I miss my pet when I am away                                                       | Chumley et al. (1993) Military Companion Survey (MCS) [47]<br>/ Kafer et al. (2002) Pet Relationship Scale (PRS) [48] |
| I often find myself talking about my dog when in company                           | Archer & Ireland (2011) Dog Attachment Questionnaire (DAQ) [49]                                                       |
| I often incorporate play in to training sessions with my dog                       | Fratkin (2015) Relationship Questionnaire (RQ) [31]                                                                   |
| I often show off my dog and talk about my dog's purpose to others                  | Fratkin (2015) Relationship Questionnaire (RQ) [31]                                                                   |
| I participate in organized events with my dog                                      | Schneider et al. (2010) Quality of Life and Human Animal Bond [30]                                                    |
| I play fetch with my dog often                                                     | Fratkin (2015) Relationship Questionnaire (RQ) [31]                                                                   |
| I praise my dog when he/she performs well                                          | Fratkin (2015) Relationship Questionnaire (RQ) [31]                                                                   |
| I prefer to be with my pet more than others                                        | Geller (2005) Pet Attachment Scale (PATS) [56]                                                                        |
| I really like seeing pets enjoy their food / I like seeing my pet enjoy food       | Templer et al. (1981) Pet Attitude Scale (PAS) [55]                                                                   |
| I receive more companionship from friends or family than from my dog               | Archer & Ireland (2011) Dog Attachment Questionnaire (DAQ) [49]                                                       |
| I regret getting a dog because of all the things I have to do to care for it       | Schneider et al. (2010) Quality of Life and Human Animal Bond [30]                                                    |
| I regret getting my dog because of his/her behaviour problems                      | Schneider et al. (2010) Quality of Life and Human Animal Bond [30]                                                    |
| I share food with my pet                                                           | Chumley et al. (1993) Military Companion Survey (MCS) [47]<br>/ Kafer et al. (2002) Pet Relationship Scale (PRS) [48] |
| I sometimes give my dog table scraps                                               | Fratkin (2015) Relationship Questionnaire (RQ) [31]                                                                   |

|                                                                                                   |                                                                                                                       |
|---------------------------------------------------------------------------------------------------|-----------------------------------------------------------------------------------------------------------------------|
| I spend a lot of time stroking and petting my dog                                                 | Archer & Ireland (2011) Dog Attachment Questionnaire (DAQ) [49]                                                       |
| I spend time every day training my dog                                                            | Fratkin (2015) Relationship Questionnaire (RQ) [31]                                                                   |
| I spend time everyday playing with my pet                                                         | Chumley et al. (1993) Military Companion Survey (MCS) [47]                                                            |
| I take my pet along when I go jogging or walking                                                  | Kafer et al. (2002) Pet Relationship Scale (PRS) [48]                                                                 |
| I take my pet with me to visit people                                                             | Cromer & Barlow (2013) Pet Attachment and Life Impact Scale (PALIS) [63]                                              |
| I talk to my pet about things that bother me                                                      | Chumley et al. (1993) Military Companion Survey (MCS) [47]<br>/ Kafer et al. (2002) Pet Relationship Scale (PRS) [48] |
| I think about my dog frequently when we are not together                                          | Fratkin (2015) Relationship Questionnaire (RQ) [31]                                                                   |
| I think my pet is just a pet                                                                      | Holcomb et al. (1985) Pet Attachment Survey (PAS) [58]                                                                |
| I think you are interesting                                                                       | Davis & Juhasz (1995) Pet Friendship Scale (PFS) [59]                                                                 |
| I think you are smart                                                                             | Davis & Juhasz (1995) Pet Friendship Scale (PFS) [59]                                                                 |
| I treat my dog as a dog, not as a person                                                          | Fratkin (2015) Relationship Questionnaire (RQ) [31]                                                                   |
| I treat my pet to anything I happen to be eating if he/she seems interested                       | Chumley et al. (1993) Military Companion Survey (MCS) [47]<br>/ Kafer et al. (2002) Pet Relationship Scale (PRS) [48] |
| I walk my dog several times a day                                                                 | Fratkin (2015) Relationship Questionnaire (RQ) [31]                                                                   |
| I wish my dog and I never had to be apart                                                         | Dwyer et al. (2006) Monash Dog Owner Relationship Scale (MDORS) [62]                                                  |
| I wish my dog spent more time with someone else other than me                                     | Fratkin (2015) Relationship Questionnaire (RQ) [31]                                                                   |
| I worry about you                                                                                 | Davis & Juhasz (1995) Pet Friendship Scale (PFS) [59]                                                                 |
| I would be very upset if something happened to my pet                                             | Angle et al. (1993) Pet Bonding Scale (PBS) [57]                                                                      |
| I would respond similarly to both potential harm to my pet/s and potential harm to a close person | Trigg et al. (2017) Pet Owner Risk Propensity Scale (PORPS) [61]                                                      |
| I would try to keep my animals as close to me as possible when responding to disaster threat      | Trigg et al. (2017) Pet Owner Risk Propensity Scale (PORPS) [61]                                                      |
| I/we do not celebrate my dog's birthday                                                           | Archer & Ireland (2011) Dog Attachment Questionnaire (DAQ) [49]                                                       |
| If a 3-month-old puppy of kitten was having problems with destructiveness I would get rid of it   | Staats et al. (1996) Miller-Rada Commitment to Pets Scale [52]                                                        |
| If a pet destroyed a \$4,000.00 piece of furniture or personal item, I would get rid of it.       | Staats et al. (1996) Miller-Rada Commitment to Pets Scale [52]                                                        |
| If a pet destroyed a \$50.00 piece of furniture or personal item, I would get rid of it           | Staats et al. (1996) Miller-Rada Commitment to Pets Scale [52]                                                        |
| If a young pet required extensive veterinary care, I would get rid of it.                         | Staats et al. (1996) Miller-Rada Commitment to Pets Scale [52]                                                        |

|                                                                                                                                            |                                                                          |
|--------------------------------------------------------------------------------------------------------------------------------------------|--------------------------------------------------------------------------|
| If an adult dog or cat was having problems with destructiveness, I would get rid of it                                                     | Staats et al. (1996) Miller-Rada Commitment to Pets Scale [52]           |
| If an adult dog or cat was having problems with housebreaking, I would get rid of it                                                       | Staats et al. (1996) Miller-Rada Commitment to Pets Scale [52]           |
| If an emergency assembly area or shelter does not take my pet/s, I will not stay there without them, even if I feel it is my safest option | Trigg et al. (2017) Pet Owner Risk Propensity Scale (PORPS) [61]         |
| If an old pet required extensive veterinary care, I would get rid of it.                                                                   | Staats et al. (1996) Miller-Rada Commitment to Pets Scale [52]           |
| If I am on holiday without my dog, I hardly ever think about him or her                                                                    | Archer & Ireland (2011) Dog Attachment Questionnaire (DAQ) [49]          |
| If I am separated from my pet/s and unaware of their status, it would become my foremost concern.                                          | Trigg et al. (2017) Pet Owner Risk Propensity Scale (PORPS) [61]         |
| If I can't get my pet to show interest in me, I get upset or angry                                                                         | Zilcha-Mano et al. (2011) Pet Attachment Questionnaire (PAQ) [67]        |
| If I have to evacuate under immediate threat, I would never delay departure on account of my pet/s                                         | Trigg et al. (2017) Pet Owner Risk Propensity Scale (PORPS) [61]         |
| If moving my pet/s at the absolute last minute would risk my safety I would rather leave them in place                                     | Trigg et al. (2017) Pet Owner Risk Propensity Scale (PORPS) [61]         |
| If necessary, I would be able to give away my pet without any difficulties                                                                 | Zilcha-Mano et al. (2011) Pet Attachment Questionnaire (PAQ) [67]        |
| In the event of a disaster, my most important concern is staying aware of my pet/s safety                                                  | Trigg et al. (2017) Pet Owner Risk Propensity Scale (PORPS) [61]         |
| It bothers me that my dog stops me doing things I enjoyed doing before I owned it                                                          | Dwyer et al. (2006) Monash Dog Owner Relationship Scale (MDORS) [62]     |
| It is annoying that I sometimes have to change my plans because of my dog                                                                  | Dwyer et al. (2006) Monash Dog Owner Relationship Scale (MDORS) [62]     |
| It makes me mad that I don't get the affection and support I need from my pet                                                              | Beck & Madresh (2008) Pet and Partnership Scale (PPS) [60]               |
| It's worth giving up other things in life in order to have a pet                                                                           | Cromer & Barlow (2013) Pet Attachment and Life Impact Scale (PALIS) [63] |
| It is easy for me to be affectionate with my pet                                                                                           | Beck & Madresh (2008) Pet and Partnership Scale (PPS) [60]               |
| My dog always pays attention to me and obeys me right away                                                                                 | Fratkin (2015) Relationship Questionnaire (RQ) [31]                      |
| My dog and I go through the same basic routine every day                                                                                   | Fratkin (2015) Relationship Questionnaire (RQ) [31]                      |
| My dog and I spend quiet time such as watching TV, reading, or doing homework together                                                     | Fratkin (2015) Relationship Questionnaire (RQ) [31]                      |

|                                                                     |                                                                                                                            |
|---------------------------------------------------------------------|----------------------------------------------------------------------------------------------------------------------------|
| My dog chews on things that he/she is not supposed to               | Fratkin (2015) Relationship Questionnaire (RQ) [31]                                                                        |
| My dog costs too much money                                         | Dwyer et al. (2006) Monash Dog Owner Relationship Scale (MDORS) [62]                                                       |
| My dog does not always respond when I give him/her commands         | Fratkin (2015) Relationship Questionnaire (RQ) [31]                                                                        |
| My dog does not comfort me when I am upset                          | Fratkin (2015) Relationship Questionnaire (RQ) [31]                                                                        |
| *My dog does not follow me around the house very often              | Fratkin (2015) Relationship Questionnaire (RQ) [31]                                                                        |
| *My dog does not look at me often                                   | Fratkin (2015) Relationship Questionnaire (RQ) [31]                                                                        |
| My dog does not stay on command                                     | Fratkin (2015) Relationship Questionnaire (RQ) [31]                                                                        |
| *My dog follows me wherever I go                                    | Fratkin (2015) Relationship Questionnaire (RQ) [31]                                                                        |
| *My dog gets excited when I come home                               | Schneider et al. (2010) Quality of Life and Human Animal Bond [30]                                                         |
| My dog has improved my mental health                                | Schneider et al. (2010) Quality of Life and Human Animal Bond [30]                                                         |
| My dog helps me get through tough times                             | Dwyer et al. (2006) Monash Dog Owner Relationship Scale (MDORS) [62]                                                       |
| My dog helps reduce (my) anxiety                                    | Schneider et al. (2010) Quality of Life and Human Animal Bond [30]                                                         |
| My dog helps reduce (my) stress                                     | Schneider et al. (2010) Quality of Life and Human Animal Bond [30]                                                         |
| *My dog initiates play with me several times a day                  | Fratkin (2015) Relationship Questionnaire (RQ) [31]                                                                        |
| My dog is an important part of my life                              | Archer & Ireland (2011) Dog Attachment Questionnaire (DAQ) [49]                                                            |
| *My dog is constantly attentive to me                               | Fratkin (2015) Relationship Questionnaire (RQ) [31]                                                                        |
| My dog is left alone without people for several hours a day         | Fratkin (2015) Relationship Questionnaire (RQ) [31]                                                                        |
| My dog is there whenever I need to be comforted                     | Dwyer et al. (2006) Monash Dog Owner Relationship Scale (MDORS) [62]                                                       |
| My dog makes me feel good about myself                              | Schneider et al. (2010) Quality of Life and Human Animal Bond [30]                                                         |
| (I feel like) My dog makes too much mess                            | Fratkin (2015) Relationship Questionnaire (RQ) [31] / Dwyer et al. (2006) Monash Dog Owner Relationship Scale (MDORS) [62] |
| My dog often does not come right away when I call his/her name      | Fratkin (2015) Relationship Questionnaire (RQ) [31]                                                                        |
| *My dog often is not interested in playing with me                  | Fratkin (2015) Relationship Questionnaire (RQ) [31]                                                                        |
| My dog often shows signs of distress (e.g., whining) when I am away | Fratkin (2015) Relationship Questionnaire (RQ) [31]                                                                        |
| *My dog pays more attention to strangers than he/she does with me   | Fratkin (2015) Relationship Questionnaire (RQ) [31]                                                                        |
| *My dog shows more interest in me than in my family/friends         | Fratkin (2015) Relationship Questionnaire (RQ) [31]                                                                        |
| *My dog spends more time with me than he/she does with anyone else  | Fratkin (2015) Relationship Questionnaire (RQ) [31]                                                                        |

|                                                                                              |                                                                                                                                                               |
|----------------------------------------------------------------------------------------------|---------------------------------------------------------------------------------------------------------------------------------------------------------------|
| *My dog usually plays by himself/herself or someone else instead of me, even when I'm around | Fratkin (2015) Relationship Questionnaire (RQ) [31]                                                                                                           |
| *My dog usually walks away when I pet him/her                                                | Fratkin (2015) Relationship Questionnaire (RQ) [31]                                                                                                           |
| *My dog will come and sit next to me                                                         | Schneider et al. (2010) Quality of Life and Human Animal Bond [30]                                                                                            |
| *My dog will follow me around the house                                                      | Schneider et al. (2010) Quality of Life and Human Animal Bond [30]                                                                                            |
| My pet and I watch TV together frequently                                                    | Chumley et al. (1993) Military Companion Survey (MCS) [47] / Kafer et al. (2002) Pet Relationship Scale (PRS) [48]                                            |
| My pet calms me down                                                                         | Cromer & Barlow (2013) Pet Attachment and Life Impact Scale (PALIS) [63]                                                                                      |
| My pet cheers me up                                                                          | Cromer & Barlow (2013) Pet Attachment and Life Impact Scale (PALIS) [63]                                                                                      |
| My pet gives me a reason for getting up in the morning                                       | Chumley et al. (1993) Military Companion Survey (MCS) [47] / Kafer et al. (2002) Pet Relationship Scale (PRS) [48]                                            |
| My pet gives me something that I can form a close emotional bond with                        | Cromer & Barlow (2013) Pet Attachment and Life Impact Scale (PALIS) [63]                                                                                      |
| My pet goes to the veterinarian for regular checkups and shots                               | Kafer et al. (2002) Pet Relationship Scale (PRS) [48]                                                                                                         |
| My pet has feelings                                                                          | Angle et al. (1993) Pet Bonding Scale (PBS) [57]                                                                                                              |
| My pet helps me to be more physically active                                                 | Kafer et al. (2002) Pet Relationship Scale (PRS) [48]                                                                                                         |
| My pet is a financial hardship                                                               | Cromer & Barlow (2013) Pet Attachment and Life Impact Scale (PALIS) [63]                                                                                      |
| My pet is a source of constancy in my life                                                   | Zasloff (1996) Comfort from Companion Animals Scale (CCAS) [64]                                                                                               |
| My pet is a valuable possession                                                              | Chumley et al. (1993) Military Companion Survey (MCS) [47] / Kafer et al. (2002) Pet Relationship Scale (PRS) [48]                                            |
| My pet is constantly at my side                                                              | Chumley et al. (1993) Military Companion Survey (MCS) [47] / Kafer et al. (2002) Pet Relationship Scale (PRS) [48]                                            |
| My pet is fun and entertaining                                                               | Cromer & Barlow (2013) Pet Attachment and Life Impact Scale (PALIS) [63]                                                                                      |
| My pet is my companion                                                                       | Cromer & Barlow (2013) Pet Attachment and Life Impact Scale (PALIS) [63]                                                                                      |
| My pet makes me feel confident                                                               | Beck & Madresh (2008) Pet and Partnership Scale (PPS) [60]                                                                                                    |
| My pet makes me feel important                                                               | Angle et al. (1993) Pet Bonding Scale (PBS) [57]                                                                                                              |
| My pet makes me feel needed                                                                  | Zasloff (1996) Comfort from Companion Animals Scale (CCAS) [64]                                                                                               |
| My pet means more to me than any of my friends                                               | Holcomb et al. (1985) Pet Attachment Survey (PAS) [58] / Templer et al. (1981) Pet Attitude Scale (PAS) [55] / Geller (2005) Pet Attachment Scale (PATS) [65] |
| My pet provides me with pleasurable activity                                                 | Zasloff (1996) Comfort from Companion Animals Scale (CCAS) [64]                                                                                               |
| My pet provides stability for me                                                             | Cromer & Barlow (2013) Pet Attachment and Life Impact Scale (PALIS) [63]                                                                                      |



|                                                                                                                                                  |                                                                            |
|--------------------------------------------------------------------------------------------------------------------------------------------------|----------------------------------------------------------------------------|
| *My pet stays close to me when I am upset                                                                                                        | Angle et al. (1993) Pet Bonding Scale (PBS) [57]                           |
| My pet teaches me responsibility                                                                                                                 | Cromer & Barlow (2013) Pet Attachment and Life Impact Scale (PALIS) [63]   |
| My pet teaches me to be more loving                                                                                                              | Cromer & Barlow (2013) Attachment and Life Impact Scale (PALIS) [58]       |
| My pet teaches me to trust                                                                                                                       | Cromer & Barlow (2013) Pet Attachment and Life Impact Scale (PALIS) [63]   |
| One of my favourite things to do is spend time with my pet                                                                                       | Angle et al. (1993) Pet Bonding Scale (PBS) [57]                           |
| Owning a dog has improved my social life                                                                                                         | Schneider et al. (2010) Quality of Life and Human Animal Bond [30]         |
| Owning a dog helps me meet people                                                                                                                | Schneider et al. (2010) Quality of Life and Human Animal Bond [30]         |
| People are more important to me than my dog is                                                                                                   | Archer & Ireland (2011) Dog Attachment Questionnaire (DAQ) [49]            |
| Pet comes on family trips                                                                                                                        | Melson (1998) Pet Attachment Scale – Revised (developed for children) [54] |
| Pets take a lot of time but it is worth it                                                                                                       | Cromer & Barlow (2013) Pet Attachment and Life Impact Scale (PALIS) [63]   |
| Signs of affection from my pet bolster my self-worth                                                                                             | Zilcha-Mano et al. (2011) Pet Attachment Questionnaire (PAQ) [67]          |
| Someone else other than me is usually the one that takes care of my dog                                                                          | Fratkin (2015) Relationship Questionnaire (RQ) [31]                        |
| Sometimes my only friend is my pet                                                                                                               | Angle et al. (1993) Pet Bonding Scale (PBS) [57]                           |
| Taking care of my dog has increased the stress in my life                                                                                        | Fratkin (2015) Relationship Questionnaire (RQ) [31]                        |
| Talking to my pet makes me feel better                                                                                                           | Cromer & Barlow (2013) Pet Attachment and Life Impact Scale (PALIS) [63]   |
| The loss of my dog would mean as much to me as the loss of a family member or friend                                                             | Archer & Ireland (2011) Dog Attachment Questionnaire (DAQ) [49]            |
| There are major aspects of owning a dog I don't like                                                                                             | Dwyer et al. (2006) Monash Dog Owner Relationship Scale (MDORS) [62]       |
| There are times I'd be lonely except for my pet                                                                                                  | Chumley et al. (1993) Military Companion Survey (MCS) [47]                 |
| Thinking about my dog makes me feel good                                                                                                         | Schneider et al. (2010) Quality of Life and Human Animal Bond [30]         |
| Walking my dog relieves my stress                                                                                                                | Schneider et al. (2010) Quality of Life and Human Animal Bond [30]         |
| What I like about my dog is its acceptance, love and loyalty                                                                                     | Archer & Ireland (2011) Dog Attachment Questionnaire (DAQ) [49]            |
| When I feel bad, I seek my pet for comfort                                                                                                       | Geller (2005) Pet Attachment Scale (PATS) [65]                             |
| When I hear about extreme examples of people risking their safety to rescue their animals, I empathise and feel I would likely do the same thing | Trigg et al. (2017) Pet Owner Risk Propensity Scale (PORPS) [61]           |

|                                                                                                |                                                                   |
|------------------------------------------------------------------------------------------------|-------------------------------------------------------------------|
| When I'm alone, I often think about my dog                                                     | Archer & Ireland (2011) Dog Attachment Questionnaire (DAQ) [49]   |
| When I'm away from my pet for a long period of time, I hardly think about it                   | Zilcha-Mano et al. (2011) Pet Attachment Questionnaire (PAQ) [67] |
| When my dog is upset, I give him/her time to return to a calm emotional state                  | Fratkin (2015) Relationship Questionnaire (RQ) [31]               |
| When people let me down I don't find that I rely more upon my dog for companionship and solace | Archer & Ireland (2011) Dog Attachment Questionnaire (DAQ) [49]   |
| When talking to my dog I often use endearing terms or baby talk                                | Archer & Ireland (2011) Dog Attachment Questionnaire (DAQ) [49]   |
| *When you come home, your pet is the first one to greet you                                    | Holcomb et al. (1985) Pet Attachment Survey (PAS) [58]            |
| Without acts of affection from my pet I feel worthless                                         | Zilcha-Mano et al. (2011) Pet Attachment Questionnaire (PAQ) [67] |
| You are too busy to spend time with your pet                                                   | Holcomb et al. (1985) Pet Attachment Survey (PAS) [58]            |
| You buy presents for your pet                                                                  | Holcomb et al. (1985) Pet Attachment Survey (PAS) [58]            |
| You feel sad when you are separated from your pet                                              | Holcomb et al. (1985) Pet Attachment Survey (PAS) [58]            |
| You ignore your pet when he/she approaches                                                     | Holcomb et al. (1985) Pet Attachment Survey (PAS) [58]            |
| You like to touch and stroke your pet                                                          | Holcomb et al. (1985) Pet Attachment Survey (PAS) [58]            |
| You show photos of your pet to your friends                                                    | Holcomb et al. (1985) Pet Attachment Survey (PAS) [58]            |
| You spend time each day grooming your pet                                                      | Holcomb et al. (1985) Pet Attachment Survey (PAS) [58]            |
| You talk to your pet as a friend                                                               | Holcomb et al. (1985) Pet Attachment Survey (PAS) [58]            |
| *Your pet is aware of your different moods                                                     | Holcomb et al. (1985) Pet Attachment Survey (PAS) [58]            |
| *Your pet tries to stay near by following you                                                  | Holcomb et al. (1985) Pet Attachment Survey (PAS) [58]            |
